# Supplementary material
Source: PubMed Central journal article supplement (PMC4875448)
Supplement: 13238_2013_3060_MOESM1_ESM.pdf [file 13238_2013_3060_MOESM1_ESM.pdf]

## **Supplementary Information**

### **Protein Interactions in the Murine Cytomegalovirus Capsid**

#### **Revealed by CryoEM**

Wong H. Hui<sup>1,2</sup>, Qiyi Tang<sup>3</sup>, Hongrong Liu<sup>1,2,6</sup>, Ivo Atanasov<sup>1,2</sup>, Fenyong Liu<sup>4</sup>, Hua Zhu<sup>5</sup>, Z. Hong Zhou<sup>1,2,\*</sup>

<sup>1</sup>The California NanoSystems Institute (CNSI), University of California, Los Angeles (UCLA), Los Angeles, CA 90095-1594, USA

<sup>2</sup>Department of Microbiology, Immunology & Molecular Genetics, UCLA, Los Angeles, CA 90095-736422, USA

<sup>3</sup>Department of Microbiology/AIDS program, Ponce School of Medicine  
395 Zona Industrial Reparadara-2, Ponce, PR 00716-2348, Puerto Rico

<sup>4</sup> School of Public Health, University of California at Berkeley, Berkeley, CA 94720, USA

<sup>5</sup>Department of Microbiology and Molecular Genetics, International Center for Public Health (or ICPH), Room E350D, 225 Warren Street, UMDNJ-New Jersey Medical School, Newark, NJ 07103-3506, USA

<sup>6</sup>Current address: College of Physics and Information Science, Hunan Normal University, 36 Lushan Road, Changsha, Hunan 410081, China

**Running title:** Murine cytomegalovirus capsid structure

**Key words:** cytomegalovirus; herpes simplex virus type 1; cryo electron microscopy; three-dimensional; major capsid protein.

\*To whom correspondence should be addressed.

E-mail: Hong.Zhou@ucla.edu.

Tel: 310-983-1033

**Legends of Supplemental Figures:**

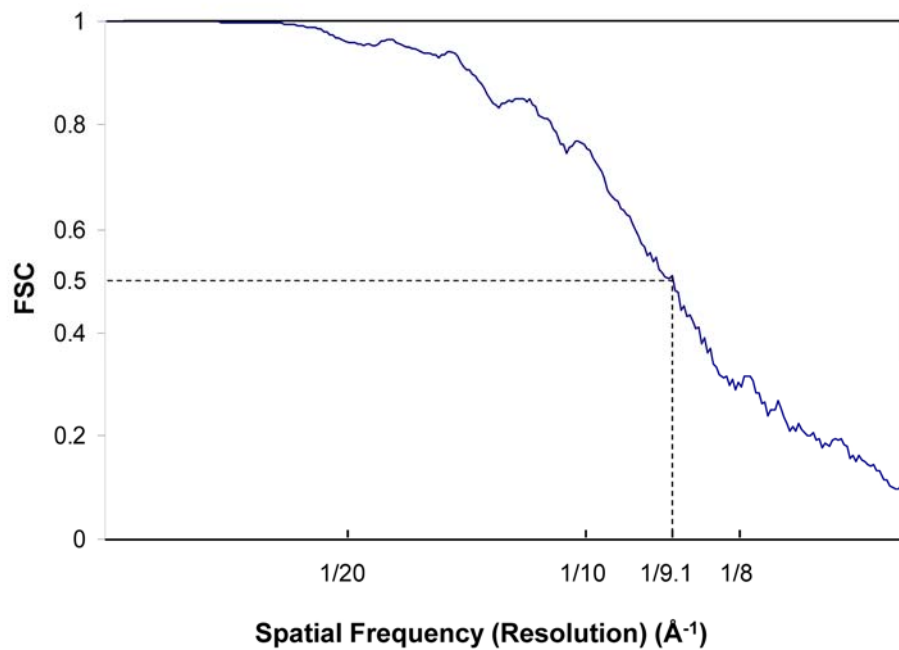

**Fig. S1**

**Figure S1. Fourier shell correlation (FSC) curve.** The estimated resolution of the MCMV capsid is 9.1 Å at FSC = 0.5.

```

HSV-1: 484 ANPYGAYVAAP-AGPAADMQQFLNawgQRLAHGRVVRWVAEGQMTPEQFMQPDNANLALE 542
HMM : aellgleverepelanlarrlrefye...akaeapvtdnaakaelttedflkpenelLr1E
MCMV : 478 RALCRREFVREHMAHATRRLVHFYQ---ARIDPRTANEAKHDFSTKEFAKVDNYLLFTE 534

HSV-1: 543 LHPAFDFDFVGVADVELPggdvppagpgEIQATWRVVNGNLPLALCPAAFRDARGLELGV- 601
HMM : lhPlFDffvaqedvelp.....avratpRiivGniPlpLapadFreargkqleea
MCMV : 535 LHPFFDFCFHTENGQV-----RPLCTPRIMVGNLPEALAPADFHDLRAKQALEL 583

HSV-1: 602 -GRHAM--APATIAAVRGAFDDRNYPAVFYLLQAAIHGSEHVFCALARLVVQCITSYWNN 658
HMM : aklakle.seatvevvqetledpnYPelfYliealiHGseeaFlalarlvaqcinsywen
MCMV : 584 TKVRAPEgHEATLQVLRASLTDHQYPELFYLIESLIHGDPAAFETGIELVTRCVNNYWRQ 643

HSV-1: 659 TRCAAFVNDYSLVSIVVVTYLG-GDLPEECMAVYRDLVAHVEALAQLVDDFTLtgPELGGQ 717
HMM : sgrlaFvnsfemvklIathlgdgelpeevlavYrklIsevralkrlvskltl.neqlgee
MCMV : 644 RGLLAFANSYDMVRLIATRLGDGAVVPAAYTHYRNLLSITRFVARTCELTGL-NGRLCDE 702

HSV-1: 718 AQAELNHLMRDPALLPPLVWDCDALMRRAAldrhRDCRVSAAGHD-PVYAAACNVATADF 776
HMM : sleelvnallDpallpPlvydcalkree...rnkvkaggeelkaaeaeernaevsf
MCMV : 703 PLLAYVSALHDPRLWPPFVQA---LPRNA---NLVRVVADDVPLDAAHIEERNPGTSD 754

HSV-1: 777 N-RNDGQLLHNTQARAA--DAADDRPHRGADWTVHHKIYYYVMVPAFSRGRCTAGVRFD 833
HMM : verlenlIaheravvddrreadedeprdeeeelvleKifYyvvlPaltngrvCgmGvdIk
MCMV : 755 VARMIAMDQAEPLFVDARRTSD-----EEMVAQKVYYLCLVPAVLNNHACGAGLNLK 806

HSV-1: 834 RVYATL---QNMVPE---IAPGEECPSPvtdpahplhpaNLVANTVAMFHNGRVV-V 886
HMM : nvlItlfyneavvvpd...evaeaaield.....nllaetlndllhnseva.v
MCMV : 807 HLLVKLFYTKFFLTADpdsLTAGEEALTNn-----PLLAALVRDVATDENVTaN 855

HSV-1: 887 DGPAMLTlQVLAHNMAERTTALCSAAPDAGANTASTT-NMRFIDGALHAGILLMAPQHL 945
HMM : dadalreLqelvlInvaertkaleveaalDaaqrtaate.nfrvldgvLynGlllmaipkr
MCMV : 856 QAA--EELFHLVAHVPEAQAQMLEIRAALDPAQRHGAPSaGFESLQHVLYNGFCMTTPVKL 913

HSV-1: 946 DHTIQnGDYFYPLPVHALFAGAdhvANAPNFPPALRDLRSRQVPL-----VPPALGA 997
HMM : drtva.eeyfypvPvhklyadp...avaatlnaeirelleelps.qRndggFpvpPalaa
MCMV : 914 L-----QEYLTVIPFHRFYSDP---GLAATANHDIRVFLNDFPQyQRCDGGFPLSPIFAH 965

HSV-1: 998 NYFSSIRQPVVQHVRESAAGENALTyALMAGYFKISPVALHHLKLTGLH 1045
HMM : eyyewhrsPvakYaecaatlsls.aLlamyfKlsPvalilqlkklH
MCMV : 966 EYHHWHRTPFSCYSAACAHTLESVL-TLAIMHHKMSPVSIAAALSRMGLH 1013

```

Fig. S2

**Figure S2. Sequence Alignment of MCPud of HSV-1 and MCMV**

Alignment of sequence between the MCP upper domain of MCMV with HSV-1, obtained from the Pfam Sequence Search server (Finn et al., 2010) (<http://pfam.sanger.ac.uk/search>).

Only the results corresponding to residues of HSV-1 MCPud (aa 484 to 1045) are shown.

The section which is discussed in Figure 2 is highlighted in red.

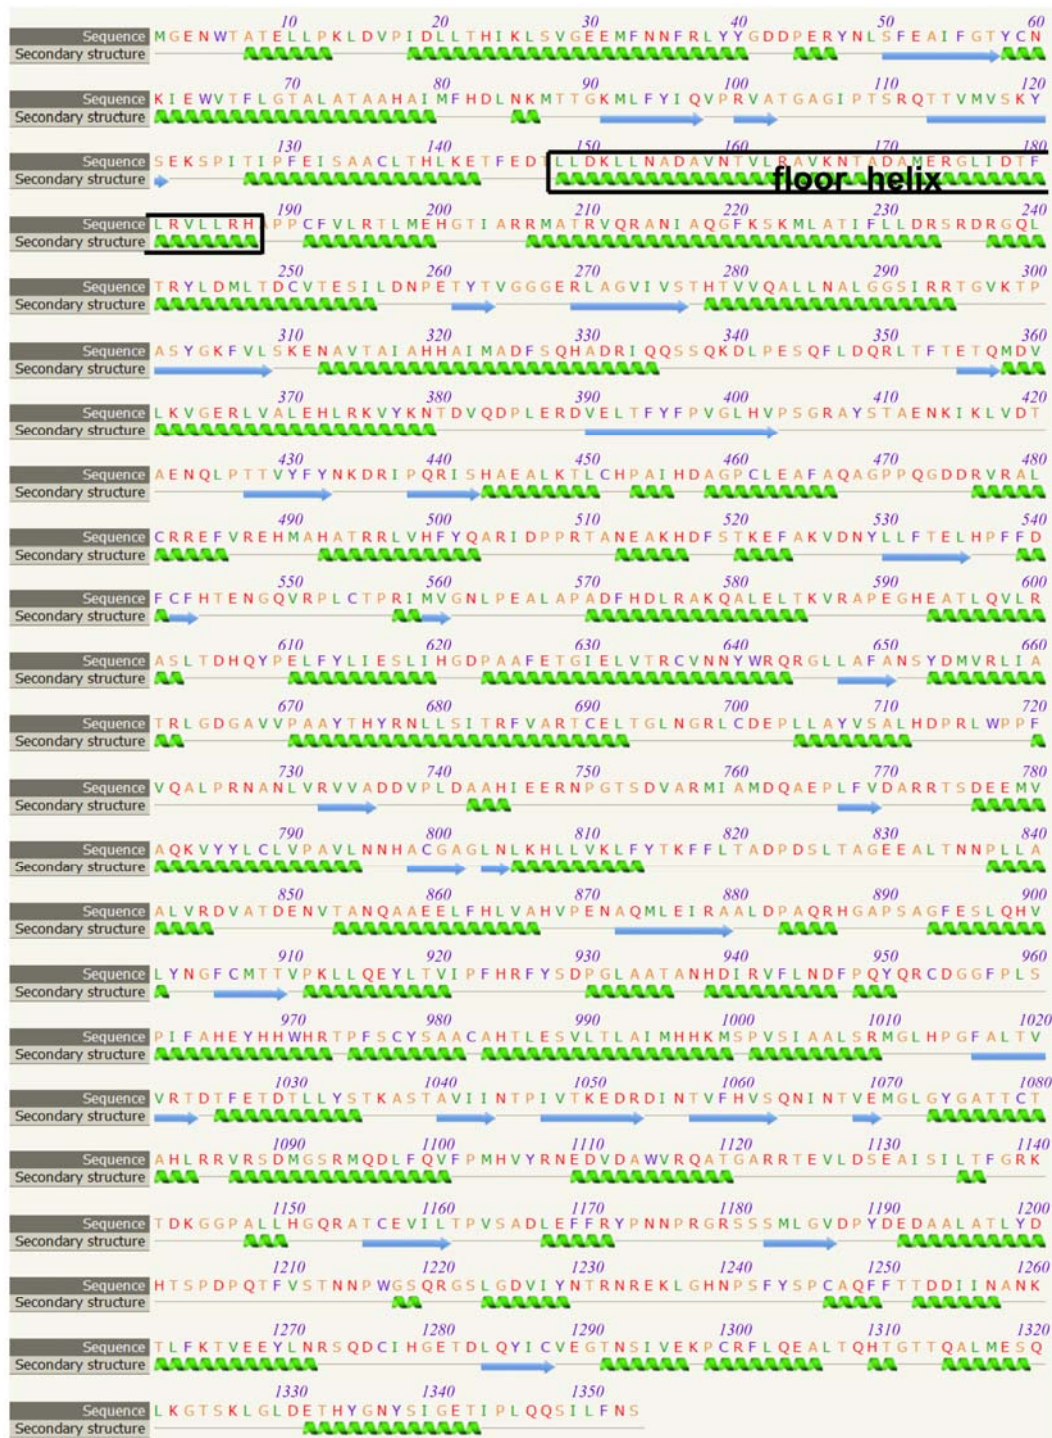

Fig. S3

**Figure S3. Secondary structures of MCMV MCP.** The prediction was carried out by three different prediction servers (Jpred Secondary Structure Prediction Server (Cole et al., 2008), PsiPred Protein Structure Prediction Server (Buchan et al., 2010) and Phyre<sup>2</sup> Protein Fold Recognition Server) and only the results from Phyre<sup>2</sup> Protein Fold Recognition Server (<http://www.sbg.bio.ic.ac.uk/phyre2/html/page.cgi?id=index>) are shown. Green helical ribbon: helix; blue arrow:  $\beta$  strand; grey line: loop.

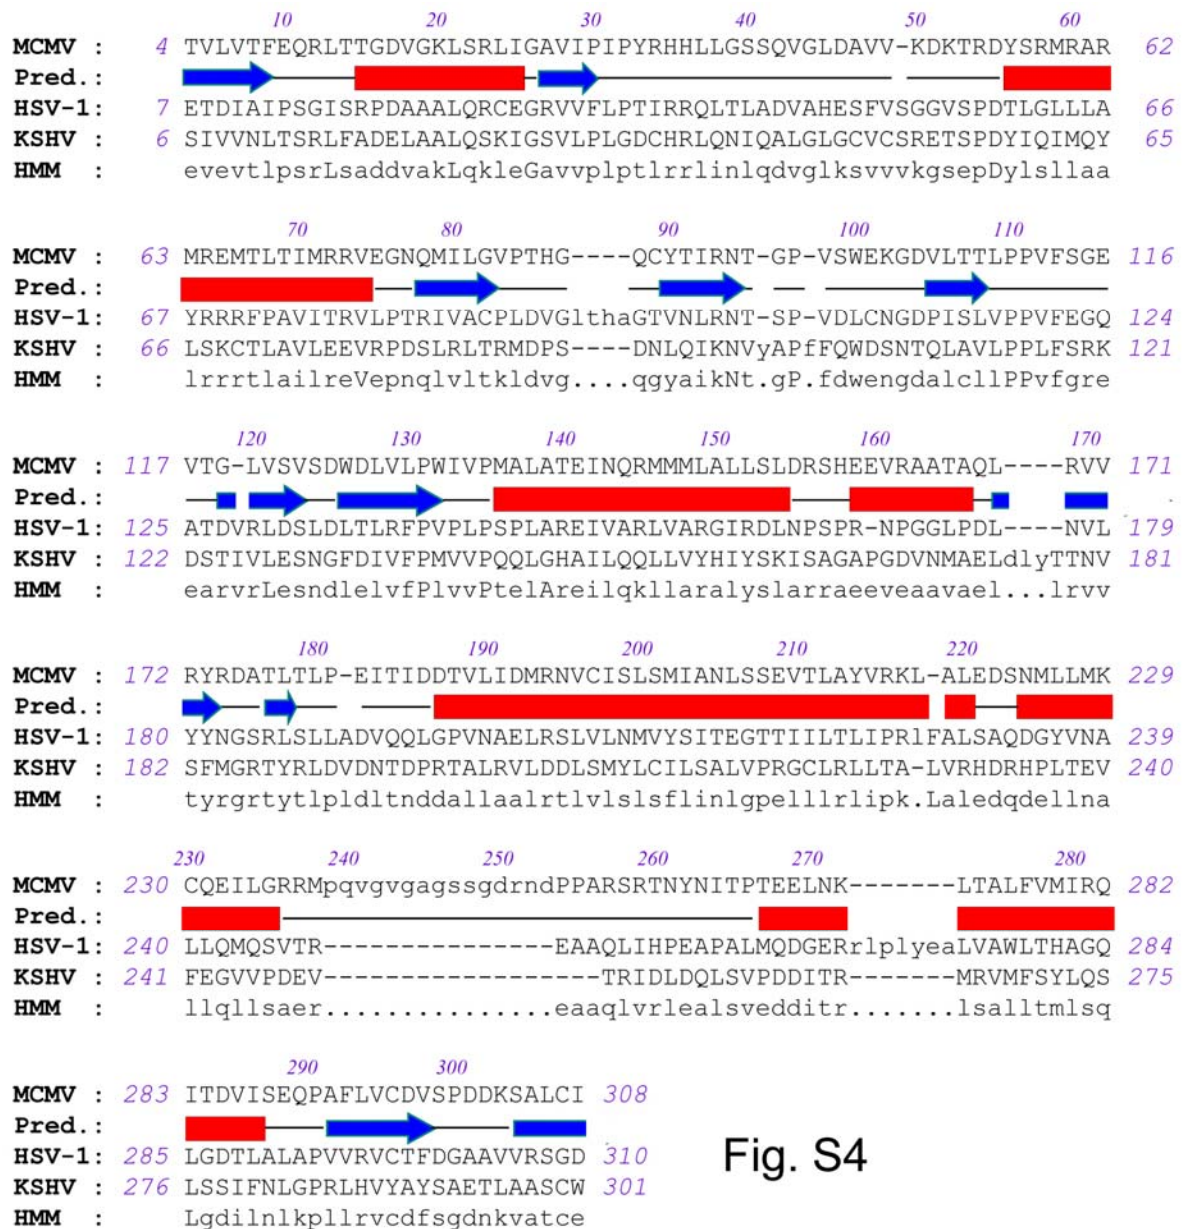

Fig. S4

**Figure S4. Multi-sequence alignment of TRI-2 protein homologs across three herpesvirus subfamilies: MCMV M85, HSV-1 VP23, KSHV ORF26 and secondary structure prediction of MCMV TRI-2.** Secondary structure prediction of MCMV TRI-2 by the PsiPred Protein Structure Prediction Server (Buchan et al., 2010) (<http://bioinf.cs.ucl.ac.uk/psipred/>) and are depicted in the second row. Red box: helix; blue arrow:  $\beta$  strand; black line: loop. The Hidden Markov Model (HMM) of the alignment generated by the Pfam server is shown in the last row. Numbers indicate amino-acid residual numbers in each sequence. Dashed lines in the sequences (dotted lines in the HMM model) represent deletions.



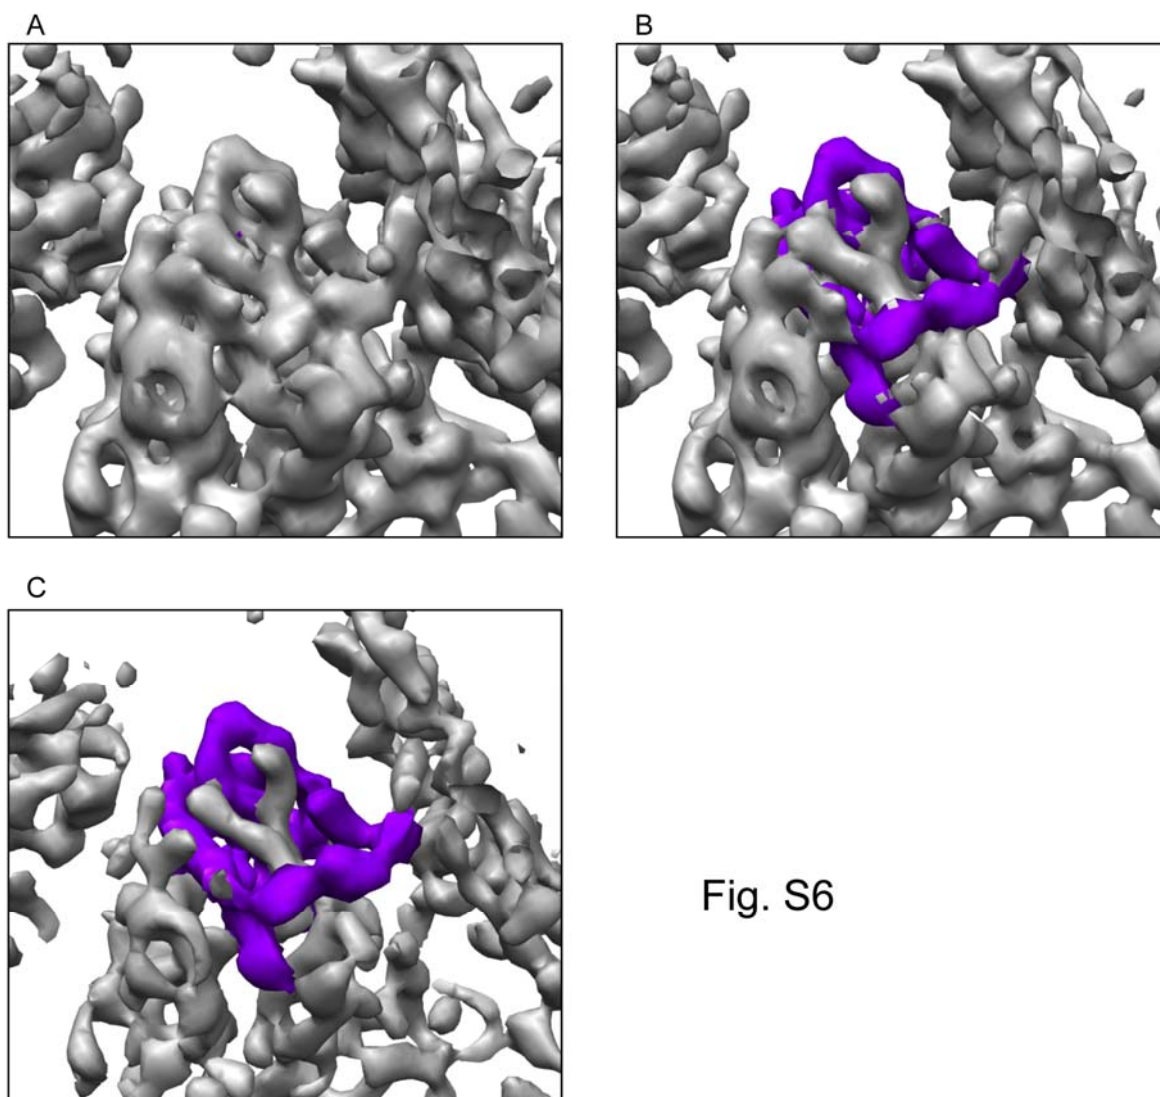

Fig. S6

**Figure S6. Estimation of molecular boundaries by varying density threshold for display.** The averaged triplex density map was shown at three different density threshold values of 3.0 (A), 3.4 (B) and 4.5 (C). The densities corresponding to TRI-2a (purple) begin to be resolved from the rest of densities when the threshold density is above 3.4. This threshold-based estimation was used in conjunction with other available constraints to establish the final boundaries (see text).

## **Legends for Supplementary Movies:**

### **Movie 1: MCMV Capsid Map from 3-fold View.**

Radially color-shaded surface representation of the MCMV capsid reconstruction at ~9.1 Å resolution. One half of the full map is rotated, revealing hexons, pentons, triplexes arranged according to T=16 icosahedral symmetry on the capsid.

### **Movie 2: Fitting of cryoEM density of MCMV MCP with atomic models of HSV-1 MCPud and with the pseudo-atomic model of MCMV MCPud.**

The cryoEM density map is shown in semitransparent gray, then the X-ray model of HSV-1 MCPud (ribbon with red helices) is superimposed, followed by the pseudo-atomic model of the MCMV MCPud (ribbon with purple helices).

### **Movie 3: Structure of triplex heterotrimer.** Related to Fig. 4.

A triplex heterotrimer, is shown first, followed by separation of its three subunits, TRI-1 (magenta), TRI-2a (green), TRI-2b (yellow) individually, to reveal interactions among these subunits.

### **Movie 4: Interaction between triplex and its adjacent hexons.** Related to Fig 5.

A triplex and its three associated hexons are shown together to reveal interactions between triplex heterotrimer and MCP.
